# Supplementary material for: Molecular Phylogenetics and the Evolution of Morphological Complexity in Aytoniaceae (Marchantiophyta)
Source: MDPI journal article supplement (doi:10.3390/plants13081053), 2024-04-09
Supplement: s1 [file plants-2948960-supplementary.pdf › plants-2948960-supplementary.pdf]

Table S1 Sequences used in Aytoniaceae phylogenetic tree, including taxa, locations, vouchers, and GenBank accession numbers. Newly generated sequences in bold face.  
“---” missing data.

| Taxon                     | Voucher information               | Localities                  | GenBank Accession |                 |                 |
|---------------------------|-----------------------------------|-----------------------------|-------------------|-----------------|-----------------|
|                           |                                   |                             | <i>rbcL</i>       | <i>trnL-F</i>   | nr 26S          |
| <i>Asterella africana</i> | Schill & Lobos 29 (E)             | Portugal                    | ---               | GQ910666        | GQ910705        |
| <i>A. australis</i>       | Glenny 6636 (?)                   | New Zealand                 | ---               | AF264660        | ---             |
| <i>A. bachmannii</i>      | Duckett s.n. (?)                  | Lesotho                     | ---               | AF264658        | ---             |
| <i>A. bolanderi</i>       | Long 27554 (E)                    | USA                         | ---               | AF264657        | ---             |
| <i>A. cruciata</i> I      | Wei et al. 20141204-42 (HSNU)     | China, Guangxi              | <b>PP566135</b>   | <b>PP566159</b> | <b>PP573773</b> |
| <i>A. cruciata</i> II     | Peng et al. 20150130-2 (HSNU)     | China, Yunnan               | <b>PP566136</b>   | <b>PP566160</b> | <b>PP573774</b> |
| <i>A. cruciata</i> III    | Shu & Wei 20151012-7 (HSNU)       | China, Sichuan              | <b>PP566137</b>   | <b>PP566161</b> | <b>PP573775</b> |
| <i>A. cruciata</i> IV     | Bardunov s.n. (KPABG)             | Russia                      | ---               | KR024222        | KR024186        |
| <i>A. cruciata</i> V      | Cao & Xiong 20141205-126 (HSNU)   | China, Guizhou              | <b>PP566138</b>   | <b>PP566162</b> | <b>PP573776</b> |
| <i>A. innovans</i>        | Furuki 14274 (?)                  | USA, Hawaii                 | ---               | AF264656        | ---             |
| <i>A. khasyana</i> I      | Long 22420 (E)                    | India                       | ---               | AF264651        | ---             |
| <i>A. khasyana</i> II     | Xiang et al. 20161109-43 (HSNU)   | China, Yunnan               | <b>PP566134</b>   | <b>PP566158</b> | <b>PP573772</b> |
| <i>A. khasyana</i> III    | Zhu et al. 20150824-18 (HSNU)     | China, Yunnan               | <b>PP566141</b>   | <b>PP566165</b> | <b>PP573779</b> |
| <i>A. khasyana</i> IV     | Wang 20160813-1 (HSNU)            | China, Yunnan               | <b>PP566143</b>   | <b>PP566167</b> | <b>PP573781</b> |
| <i>A. lateralis</i>       | Long 29598 (E)                    | Mexico                      | ---               | GQ910671        | GQ910710        |
| <i>A. leptophylla</i> I   | Bakalin, P-40-24-12 (VBGI, KPABG) | Russia, Primorsky Territory | ---               | KR024221        | KR024185        |
| <i>A. leptophylla</i> II  | Zhu & Promma 20160728-44 (HSNU)   | China, Liaoning             | <b>PP566142</b>   | <b>PP566166</b> | <b>PP573780</b> |
| <i>A. leptophylla</i> III | Long & Furuki 24769 (?)           | Japan                       | ---               | AF264652        | ---             |

|                                                      |                                  |                     |          |          |          |
|------------------------------------------------------|----------------------------------|---------------------|----------|----------|----------|
| <i>A. lindenbergiana</i> I                           | Long 19989 (E)                   | Norway              | ---      | AF264653 | ---      |
| <i>A. lindenbergiana</i> II                          | Konstantinova, K409-3-12 (KPABG) | Russia: Caucasus    | ---      | KR024216 | KR024180 |
| <i>A. lindenbergiana</i> III                         | Konstantinova, K409-3-12 (KPABG) | Russia: Adygei      | ---      | KR024219 | KR024183 |
| <i>A. lindenbergiana</i> IV                          | Konstantinova, K437-1-07 (KPABG) | Russia: Krasnodar   | ---      | KR024218 | KR024182 |
| <i>A. macropoda</i>                                  | Gradstein 9728 (?)               | Costa Rica          | ---      | AF264655 | ---      |
| <i>A. multiflora</i> I                               | Zhu et al. 20150824-44 (HSNU)    | China, Yunnan       | PP566133 | PP566157 | PP573771 |
| <i>A. multiflora</i> II                              | Peng et al. 20150201-7 (HSNU)    | China, Yunnan       | PP566144 | PP566168 | PP573782 |
| <i>A. multiflora</i> III                             | Zhu et al. 20150824-19 (HSNU)    | China, Yunnan       | PP566145 | PP566169 | PP573783 |
| <i>A. multiflora</i> IV                              | Long 21637 (E)                   | Nepal               | ---      | AF264654 | ---      |
| <i>A. mussuriensis</i> subsp. <i>mussuriensis</i> I  | Yin et al. 20160707-24 (HSNU)    | China, Sichuan      | PP566146 | PP566170 | PP573784 |
| <i>A. mussuriensis</i> subsp. <i>mussuriensis</i> II | Xiang 20160916-9 (HSNU)          | China, Yunnan       | PP566147 | PP566171 | PP573785 |
| <i>A. palmeri</i> I                                  | Doyle 11446 (E)                  | USA, California     | KT793554 | ---      | KT793342 |
| <i>A. palmeri</i> II                                 | Long 27557 (E)                   | USA, California     | ---      | AF264640 | ---      |
| <i>A. palmeri</i> III                                | Ma 17-9030 (KUN)                 | USA, California     | PP566125 | PP566152 | PP573767 |
| <i>A. saccata</i> I                                  | Schill et al. 58 (E)             | Switzerland, Valais | ---      | GQ910672 | GQ910711 |
| <i>A. saccata</i> II                                 | Afonina s.n. (LE, KPABG)         | Russia, Chukotka    | ---      | KR024220 | KR024184 |
| <i>A. syngenesica</i>                                | Pócs 9415a (?)                   | Réunion             | ---      | AF264659 | ---      |
| <i>A. tenella</i> I                                  | Marsh 8995.3 (?)                 | USA., Arkansas      | ---      | AF264650 | ---      |
| <i>A. tenella</i> II                                 | Goffinet 8750 (E)                | USA, Connecticut    | ---      | GQ910673 | GQ910712 |
| <i>A. wallichiana</i> I                              | Yamaguchi 11384 (?)              | Japan, Iriomote     | ---      | AF264648 | ---      |
| <i>A. wallichiana</i> II                             | Yamaguchi 11280 (?)              | Japan, Okinawa      | ---      | AF264649 | ---      |
| <i>A. wallichiana</i> III                            | Zanten 93.11.2334b (?)           | Philippines         | ---      | AF264647 | ---      |

|                                                   |                                 |                       |          |          |          |
|---------------------------------------------------|---------------------------------|-----------------------|----------|----------|----------|
| <i>A. wallichiana</i> IV                          | Wei & Shu 20151012-41 (HSNU)    | China, Sichuan        | PP566148 | PP566172 | PP573786 |
| <i>A. wallichiana</i> V                           | Wei & Peng 20100913-112 (HSNU)  | China, Guangxi        | PP566150 | PP566174 | PP573787 |
| <i>A. wallichiana</i> VI                          | Long 30251 (E)                  | Nepal, Lalitpur       | ---      | GQ910674 | GQ910713 |
| <i>Asterellopsis grollei</i> I                    | Long 26964 (E)                  | China                 | ---      | AF264641 | ---      |
| <i>Asterellopsis grollei</i> II                   | Long 27203 (E)                  | China, Qinghai        | DQ286000 | GQ910670 | DQ265771 |
| <i>Asterellopsis grollei</i> III                  | Xiang 20160925-10 (HSNU)        | China, Yunnan         | PP566140 | PP566164 | PP573778 |
| <i>Asterellopsis grollei</i> IV                   | Zhu 20160815-21B (HSNU)         | China, Sichuan        | PP566139 | PP566163 | PP573777 |
| <i>Calasterella californica</i> I                 | Long 27651 (E)                  | USA                   | ---      | AF264639 | ---      |
| <i>C. californica</i> II                          | Schill & Clarke 104 (E)         | USA                   | ---      | GQ910667 | GQ910720 |
| <i>C. californica</i> III                         | Norris 80914 (?)                | USA                   | ---      | AF228785 | ---      |
| <i>Cryptomitrium himalayense</i> I                | Xiang & Shen 20190908-25 (HSNU) | China, Sichuan        | PP566151 | PP566175 | PP573788 |
| <i>C. himalayense</i> II                          | Long 30559 (E)                  | Nepal, Rasuwa         | ---      | GQ910678 | GQ910717 |
| <i>C. tenerum</i>                                 | Long 29748 (E)                  | Mexico, Querétaro     | ---      | GQ910677 | GQ910716 |
| <i>Dumortiera hirsuta</i> I                       | Wang et al. 20140722-9 (HSNU)   | China, Sichuan        | KX792412 | KX792398 | ---      |
| <i>Dumortiera hirsuta</i> II                      | Cheng et al. 20150421-43 (HSNU) | China, Zhejiang       | KX792414 | KX792400 | ---      |
| <i>Dumortiera hirsuta</i> III                     | Wei et al. 20141204-44 (HSNU)   | China, Guangxi        | KX792413 | KX792399 | ---      |
| <i>Mannia androgyna</i> I                         | Schill & Lobos 32-2 (E)         | Portugal, Madeira     | ---      | GQ910679 | GQ910718 |
| <i>M. androgyna</i> II                            | Schill & Clarke 124 (E)         | Namibia, Otjozondjupa | ---      | GQ910680 | GQ910719 |
| <i>M. californica</i> I                           | Schill & Clarke 164 (E)         | India, Uttaranchal    | ---      | GQ910681 | GQ910720 |
| <i>M. californica</i> II                          | Hugonnot s.n. (E)               | France, Ardèche       | ---      | GQ910688 | GQ910727 |
| <i>M. californica</i> III                         | Xiang et al. 20160418-21 (HSNU) | China, Yunnan         | PP566126 | OR689868 | OR700027 |
| <i>M. controversa</i> subsp. <i>controversa</i> I | Köckinger s.n. (E)              | Austria, Carinthia    | ---      | GQ910689 | GQ910728 |

|                                                 |                                   |                        |          |          |          |
|-------------------------------------------------|-----------------------------------|------------------------|----------|----------|----------|
| <i>M. controversa</i> subsp. <i>asiatica</i> II | Schill & Clarke 163 (E)           | India, Uttaranchal     | ---      | GQ910696 | GQ910735 |
| <i>M. fragrans</i> I                            | Schill & Clarke 162 (E)           | India, Uttaranchal     | ---      | GQ910690 | GQ910729 |
| <i>M. fragrans</i> II                           | Schill et al. 51 (E)              | Switzerland, Valais    | ---      | GQ910692 | GQ910731 |
| <i>M. fragrans</i> III                          | Itouga s.n. (E)                   | Japan, Honshu          | ---      | GQ910691 | GQ910730 |
| <i>M. fragrans</i> IV                           | Xiang 20160925-8 (HSNU)           | China, Sichuan         | PP566127 | OR689869 | OR700028 |
| <i>M. gracilis</i> I                            | Hugonnot s.n. (E)                 | France, Haute-Loire    | ---      | GQ910669 | GQ910708 |
| <i>M. gracilis</i> II                           | Dulin MVD-1113 (KPABG)            | Russia: Komi           | ---      | KR024198 | KR024172 |
| <i>M. gracilis</i> III                          | Stefanut B3497 (E)                | Romania, Bucegi        | ---      | GQ910668 | GQ910707 |
| <i>M. pilosa</i> I                              | Schill et al. 84 (E)              | Austria, Carinthia     | ---      | GQ910693 | GQ910732 |
| <i>M. pilosa</i> II                             | Schill et al. 85 (E)              | Austria, Carinthia     | ---      | GQ910694 | GQ910733 |
| <i>M. pilosa</i> III                            | Dulin, s.n. (KPABG)               | Russia: Komi           | ---      | KR024205 | KR024175 |
| <i>M. sibirica</i>                              | Long & Schill 35669 (E)           | USA, Minnesota         | ---      | GQ910695 | GQ910734 |
| <i>M. triandra</i> I                            | Long & Schill 35668 (E)           | USA, Minnesota         | ---      | GQ910697 | GQ910737 |
| <i>M. triandra</i> II                           | Schill et al. 87 (E)              | Austria, Carinthia     | ---      | GQ910698 | GQ910736 |
| <i>Plagiochasma appendiculatum</i>              | Wei & Shu 20151012-53 (HSNU)      | China, Sichuan         | PP566132 | PP566156 | ---      |
| <i>P. rupestre</i>                              | Schill 5 (E)                      | Portugal, Madeira      | ---      | GQ910700 | GQ910739 |
| <i>P. wrightii</i>                              | Long 29636 (E)                    | Mexico, Veracruz       | ---      | GQ910701 | GQ910740 |
| <i>Reboulia hemisphaerica</i> I                 | Zhang et al. 20150830-182 (HSNU)  | China, Fujian          | PP566128 | OR689873 | OR700031 |
| <i>R. hemisphaerica</i> II                      | Zhang et al. 20150830-181 (HSNU)  | China, Fujian          | PP566149 | PP566173 | ---      |
| <i>R. hemisphaerica</i> III                     | Shi 20150920-37 (HSNU)            | China, Anhui           | ---      | PP566153 | PP573768 |
| <i>R. hemisphaerica</i> IV                      | Borovichev BE13-6-07 (KPABG)      | Russia, Murmansk       | ---      | KR024212 | KR024178 |
| <i>R. hemisphaerica</i> V                       | Bakalin Kh-72-22-09 (VBGI, KPABG) | Russia, Perm Territory | ---      | KR024213 | KR024179 |

|                             |                                         |                        |                 |                 |                 |
|-----------------------------|-----------------------------------------|------------------------|-----------------|-----------------|-----------------|
| <i>R. hemisphaerica</i> VI  | <i>Xiang 20160218-1</i><br>(HSNU)       | China, Hunan           | <b>PP566129</b> | OR689874        | OR700032        |
| <i>R. hemisphaerica</i> VII | <i>Schill et al. 46</i> (E)             | Switzerland,<br>Valais | ---             | GQ910702        | GQ910741        |
| <i>Targionia hypophylla</i> | <i>Zhu et al. 20150824-32</i><br>(HSNU) | China, Yunnan          | <b>PP566130</b> | <b>PP566154</b> | <b>PP573769</b> |
| <i>Wiesnerella denudata</i> | <i>Xiang et al. 20160418-6</i> (HSNU)   | China, Yunnan          | <b>PP566131</b> | <b>PP566155</b> | <b>PP573770</b> |
